# Supplementary material for: High Burden of Viridans Streptococcal Endocarditis Linked to Multidrug Resistance and Regional Risk Factors: First Report From Khyber Pakhtunkhwa, Pakistan
Source: Research Square preprint supplement (doi:10.21203/rs.3.rs-8071744/v1), 2025-12-08
Supplement: Supplementary file 1 [file 2591cc9ba21fdf5be9bf3c90.pdf]

**Figure S3: Ethical Certificate issued to the principal author (PhD scholar)**

|                                                                                                                |                                                                                                                                                                              |
|----------------------------------------------------------------------------------------------------------------|------------------------------------------------------------------------------------------------------------------------------------------------------------------------------|
|                               | <b>KOHAT UNIVERSITY OF SCIENCE &amp; TECHNOLOGY</b><br>Kohat 26000, Khyber Pakhtunkhwa, Pakistan Ph// 0922-554563- 554565, Fax 0922-554556                                   |
| No. KUST/Ethical Committee/1975<br>December 02, 2024                                                           |                                                                                                                                                                              |
|                              |                                                                                                                                                                              |
| <b><u>KUST Ethical Committee Approval Certificate</u></b>                                                      |                                                                                                                                                                              |
| <b>The Thesis/Synopsis:</b>                                                                                    | <u>EPIDEMIOLOGY AND MOLECULAR CHARACTERIZATION OF</u><br><u>ANTIBIOTIC RESISTANCE GENES IN VIRIDANS STREPTOCOCCI</u><br><u>ISOLATED FROM INFECTIVE ENDOCARDITIS PATIENTS</u> |
| <b>Submitted by:</b>                                                                                           | <u>ABDUL KHALIQ</u>                                                                                                                                                          |
| <b>Registration No:</b>                                                                                        | <u>BT420222001</u>                                                                                                                                                           |
| <b>Through:</b>                                                                                                | <u>PROF. DR. NOOR MUHAMMAD, CHAIRMAN, DEPARTMENT</u><br><u>OF BIOTECHNOLOGY AND GENETIC ENGINEERING</u><br>(Chairman/Director)                                               |
| <p>After fulfilling the required documents, the KUST ethical Committee, hereby approved the above title.</p>   |                                                                                                                                                                              |
| <br>KUST Ethical Committee |                                                                                                                                                                              |
|                            |                                                                                                                                                                              |
