# Supplementary material for: High Burden of Viridans Streptococcal Endocarditis Linked to Multidrug Resistance and Regional Risk Factors: First Report From Khyber Pakhtunkhwa, Pakistan
Source: Research Square preprint supplement (doi:10.21203/rs.3.rs-8071744/v1), 2025-12-08
Supplement: Supplementary file 2 [file 9901faa03108e97a3963fcdd.pdf]

**Supplementary file:**

**Figure S1. Recruitment and confirmed *Viridans Group Streptococci* (VGS) cases by participating centers in Khyber Pakhtunkhwa.**

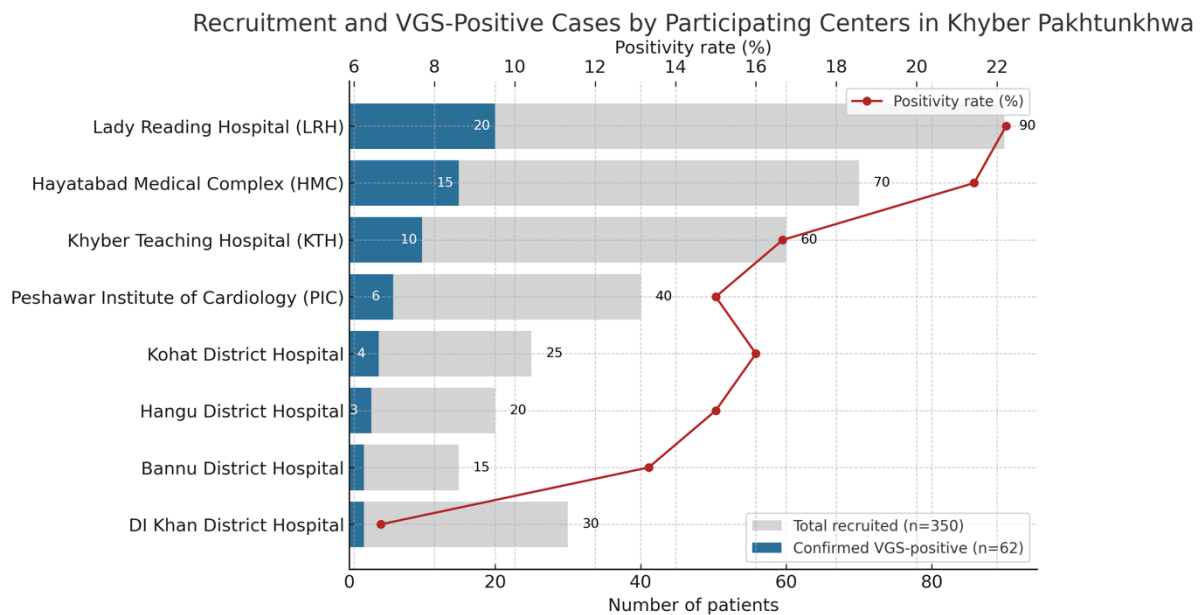

**Figure S1. Recruitment and confirmed *Viridans Group Streptococci* (VGS) cases by participating centers in Khyber Pakhtunkhwa.**

Horizontal bars indicate the total number of clinically suspected infective endocarditis patients recruited from each participating center (total  $n = 350$ ). Blue segments show the number of confirmed VGS-positive cases detected by culture and/or PCR ( $n = 62$ ). The red line (secondary x-axis) denotes the center-specific positivity rate (%) for VGS. Participating centers included the three largest tertiary cardiology hospitals in Peshawar: Lady Reading Hospital (LRH), Hayatabad Medical Complex (HMC), and Khyber Teaching Hospital (KTH) the Peshawar Institute of Cardiology (PIC) (provincial referral and interventional cardiology centre), and district-level hospitals in Kohat, Hangu, Bannu, and D.I. Khan. The figure illustrates the institutional contribution to recruitment and relative diagnostic yield across tertiary and district hospitals.

**Table S2. Distribution of recruited patients and confirmed VGS-positive cases across participating hospitals in Khyber Pakhtunkhwa**

| <b>Hospital / Center</b>               | <b>Location Type</b>                               | <b>Total Patients Recruited (n)</b> | <b>Confirmed VGS-Positive Cases (n)</b> | <b>Positivity Rate (%)</b> |
|----------------------------------------|----------------------------------------------------|-------------------------------------|-----------------------------------------|----------------------------|
| Lady Reading Hospital (LRH)            | Tertiary (Cardiology Unit, Peshawar)               | 90                                  | 20                                      | 22.2                       |
| Hayatabad Medical Complex (HMC)        | Tertiary (Cardiology Unit, Peshawar)               | 70                                  | 15                                      | 21.4                       |
| Khyber Teaching Hospital (KTH)         | Tertiary (Cardiology Unit, Peshawar)               | 60                                  | 10                                      | 16.7                       |
| Peshawar Institute of Cardiology (PIC) | Specialized Cardiology & Cardiac Surgery Institute | 40                                  | 6                                       | 15.0                       |
| Kohat District Hospital                | District Level                                     | 25                                  | 4                                       | 16.0                       |
| Hangu District Hospital                | District Level                                     | 20                                  | 3                                       | 15.0                       |
| Bannu District Hospital                | District Level                                     | 15                                  | 2                                       | 13.3                       |
| D.I. Khan District Hospital            | District Level                                     | 30                                  | 2                                       | 6.7                        |
| <b>Total</b>                           | —                                                  | <b>350</b>                          | <b>62</b>                               | <b>17.7 (Overall)</b>      |
