# Supplementary material for: High Burden of Viridans Streptococcal Endocarditis Linked to Multidrug Resistance and Regional Risk Factors: First Report From Khyber Pakhtunkhwa, Pakistan
Source: Research Square preprint supplement (doi:10.21203/rs.3.rs-8071744/v1), 2025-12-08
Supplement: Supplementary file 3 [file c14c49d5370f86b7a8ccdcee.pdf]

*Supplementary file: Raw gel pictures of PCR for house keeping genes sodA, rpoB, gtf and gyrB gene*

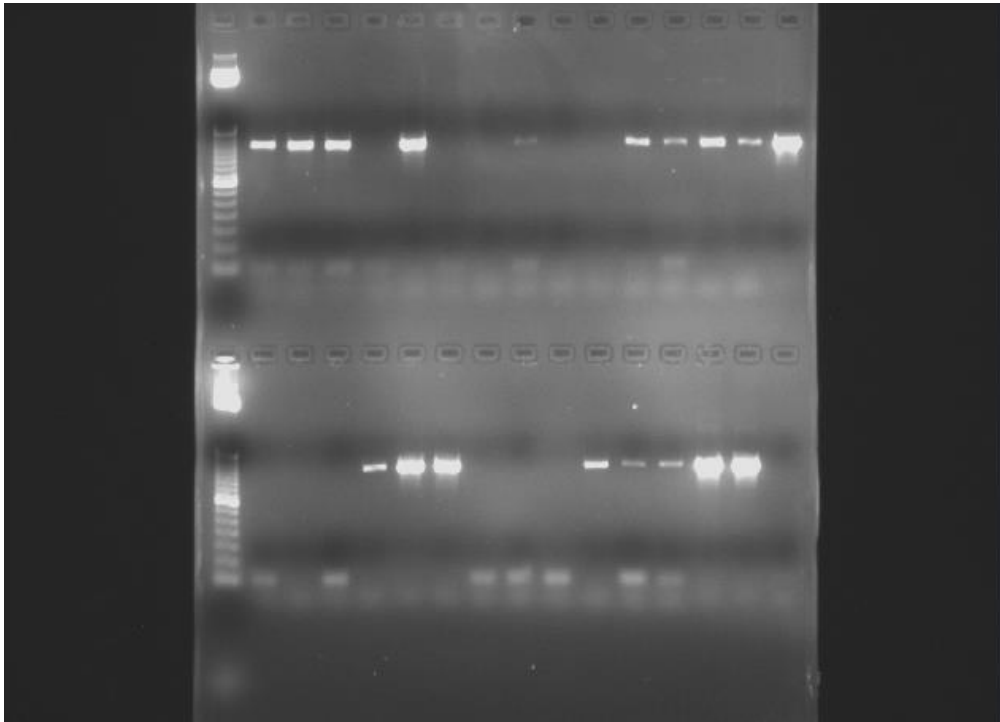

Figure S1A: Agarose gel electrophoresis showing amplification of housekeeping gene **rpoB** (~700 bp). A 50-bp DNA ladder was used as molecular size reference.

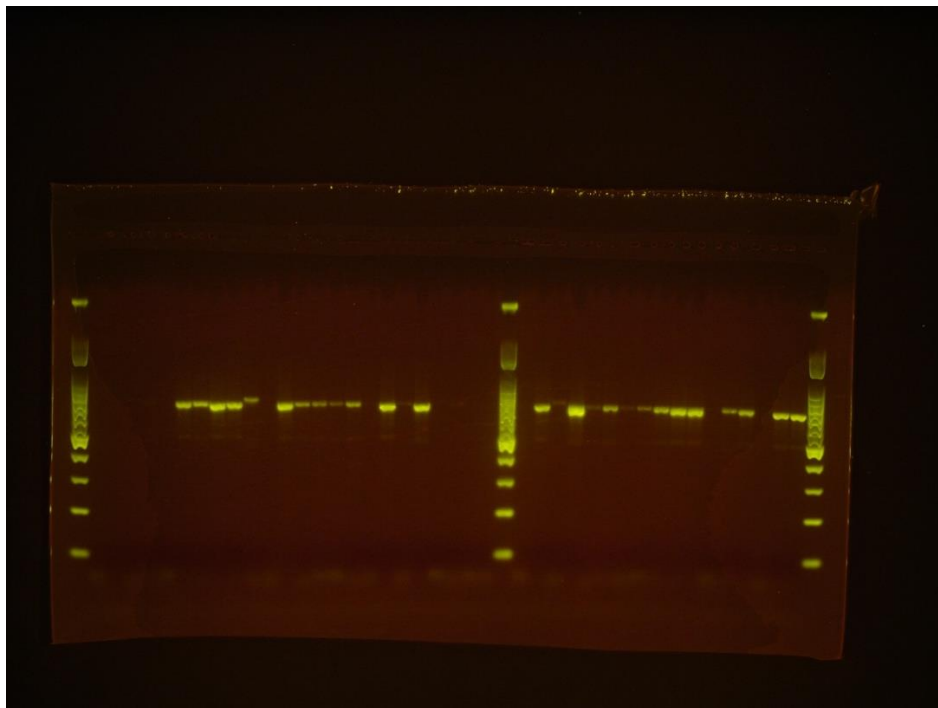

Figure S1 A: Agarose gel electrophoresis showing amplification of housekeeping gene **gyrB** (~1100 bp). A 100-bp DNA ladder was used as molecular size reference.

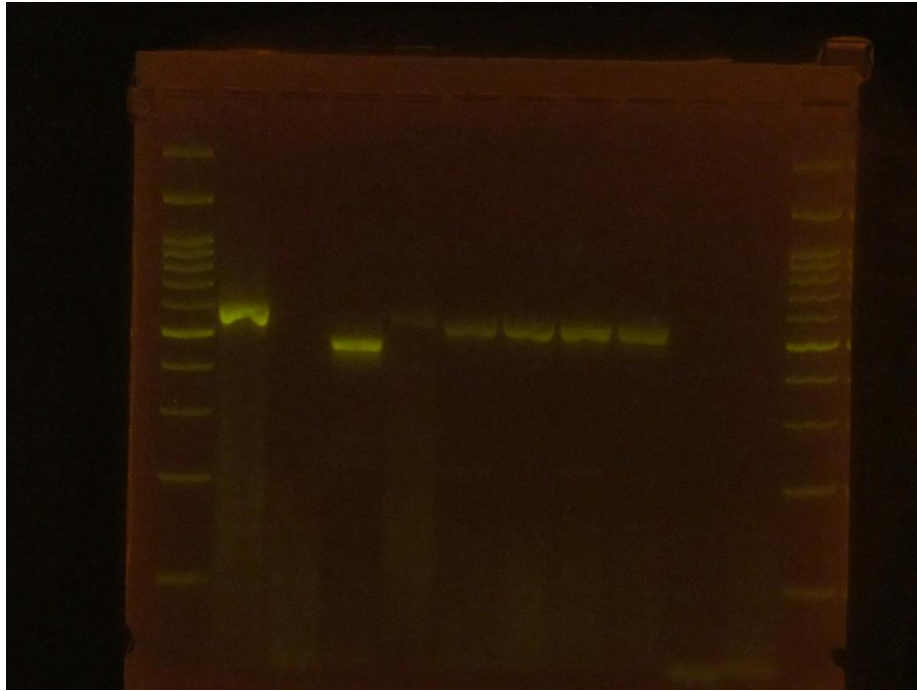

Figure S2: Agarose gel electrophoresis showing amplification of housekeeping gene **gtf** (~517 bp). A 100-bp DNA ladder was used as molecular size reference.

***Raw gel pictures of PCR for ermB and mefA (macrolide resistance), tetM and tetO (tetracycline resistance), and pbp2x (β-lactam resistance) genes***

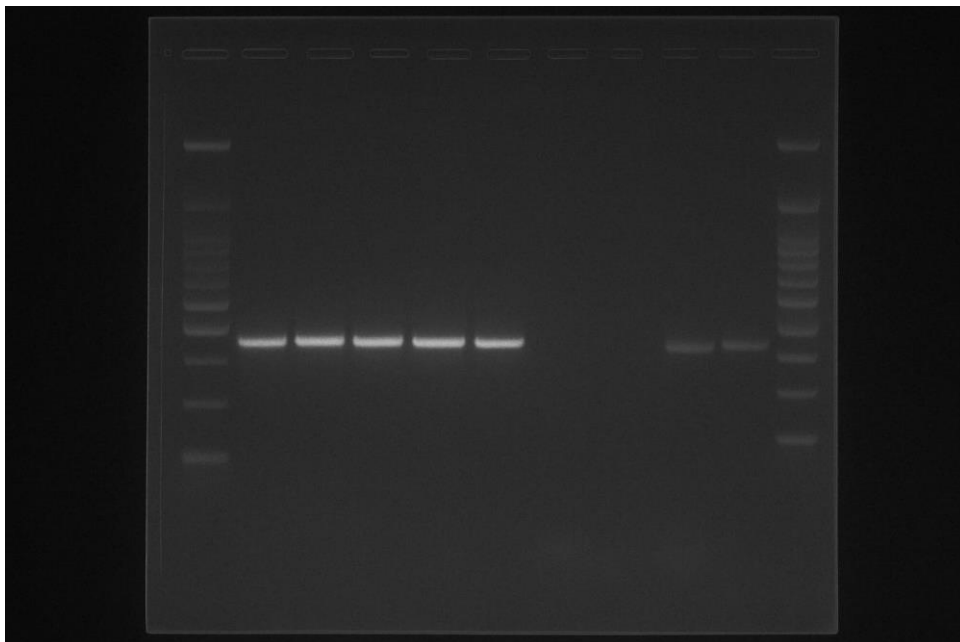

Figure S3: Agarose gel electrophoresis showing amplification of macrolide resistance gene (**mefA ~350 bp**) . A 100-bp DNA ladder was used as molecular size reference.

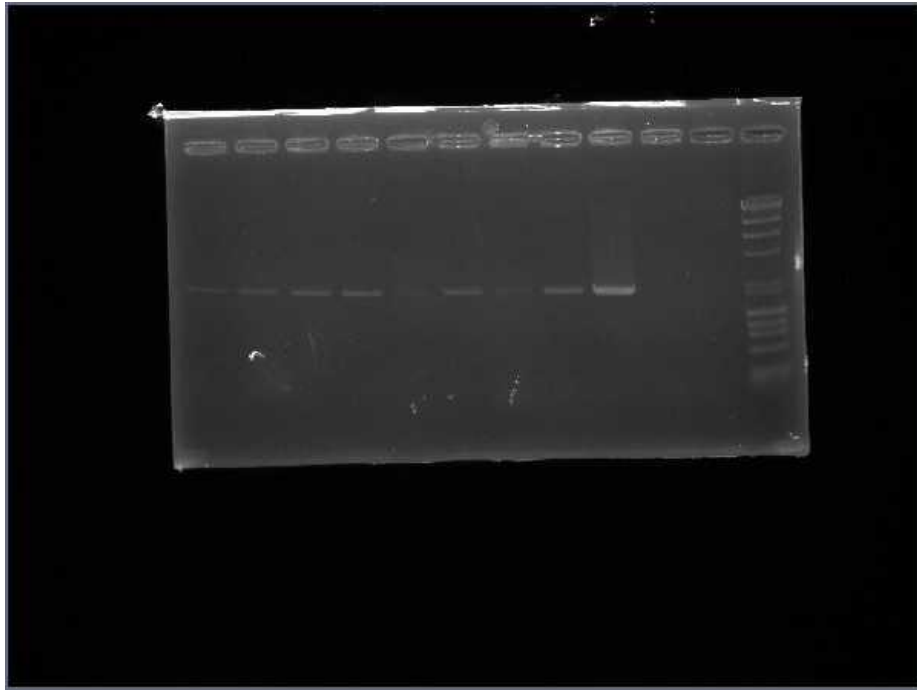

Figure S4. Agarose gel electrophoresis showing amplification of macrolide resistance gene (**ermB 648 bp**) . A 100-bp DNA ladder was used as molecular size reference.

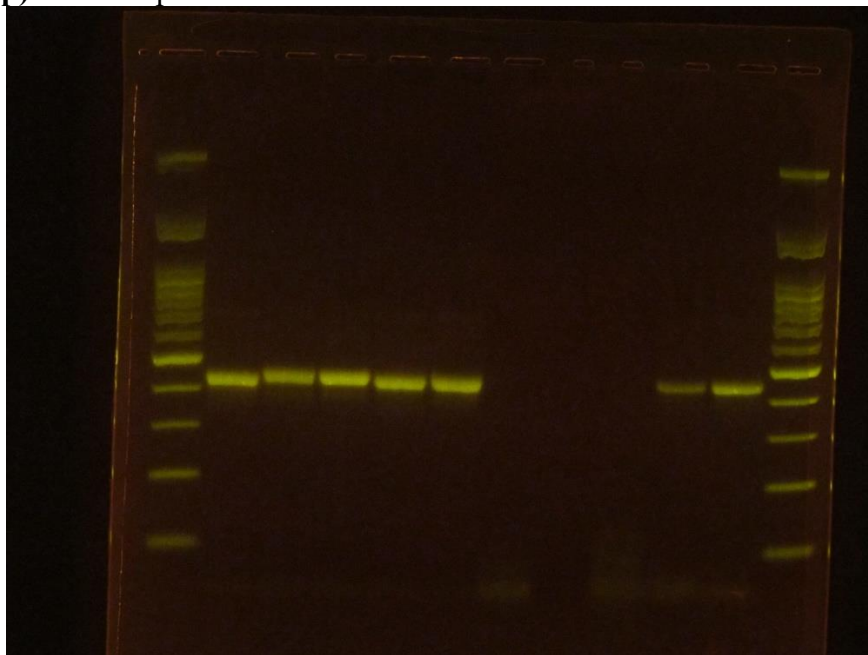

Figure S5: Agarose gel electrophoresis showing amplification of tetracycline resistance gene (**tetM 406 bp**) . A 100-bp DNA ladder was used as molecular size reference.

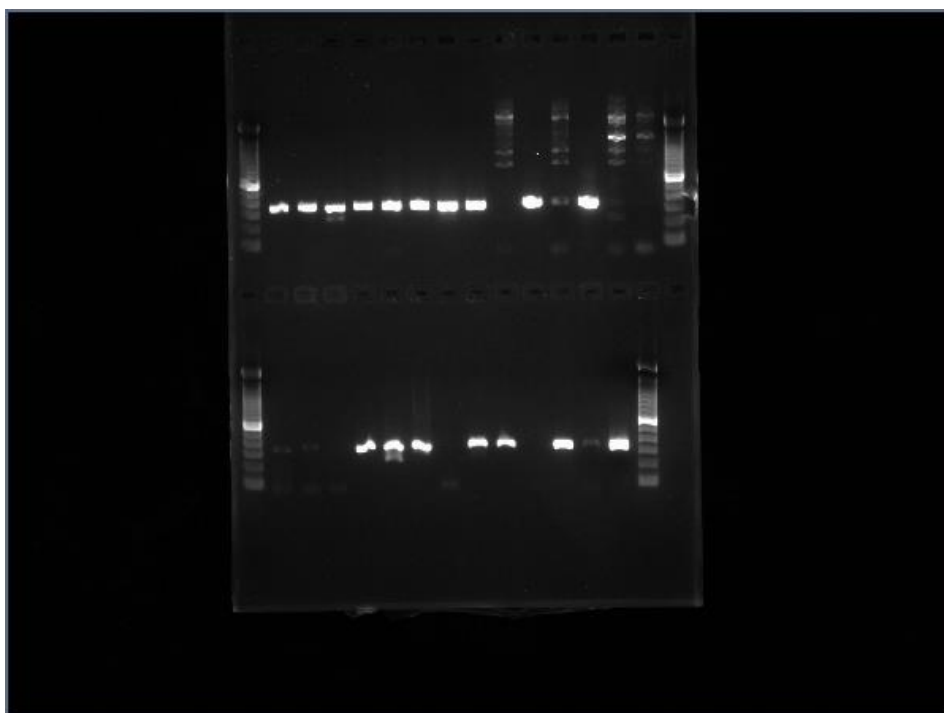

Figure S6: Agarose gel electrophoresis showing amplification of tetracycline resistance gene (*tetO* 171 bp ) . A 50-bp DNA ladder was used as molecular size reference.

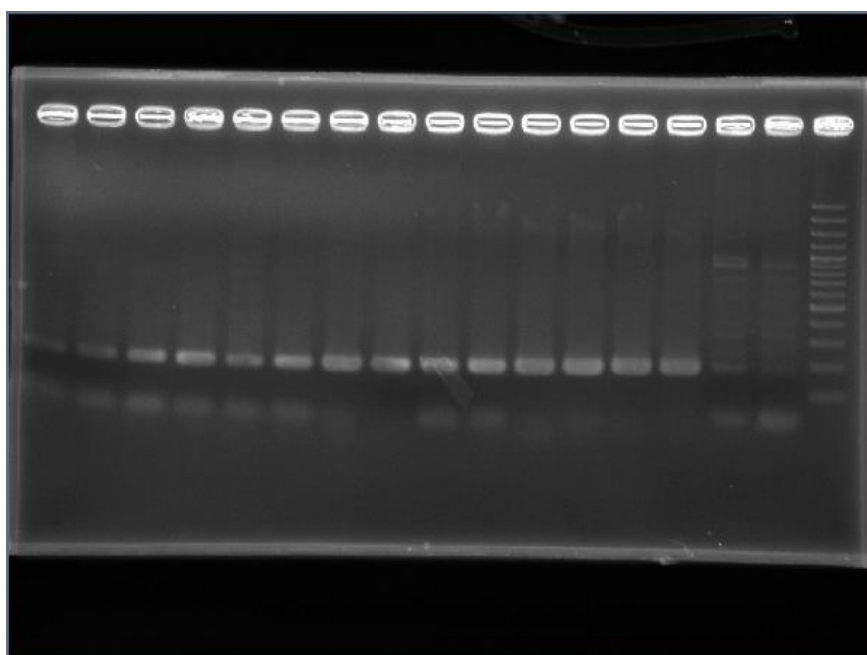

Figure S8: Agarose gel electrophoresis showing amplification of Beta Lactam resistance gene (*pbp2x* 2.1 **Kbp**) . A 1Kb DNA ladder was used as molecular size reference.
